# Supplementary figures and images for: Cost–effectiveness of ropeginterferon alfa-2b-njft for the treatment of polycythemia vera
Source: Atypon-hosted journal article supplement (doi:10.57264/cer-2023-0066), 2023-08-02

# Appendix

Figure: Probabilistic Sensitivity Analysis Results


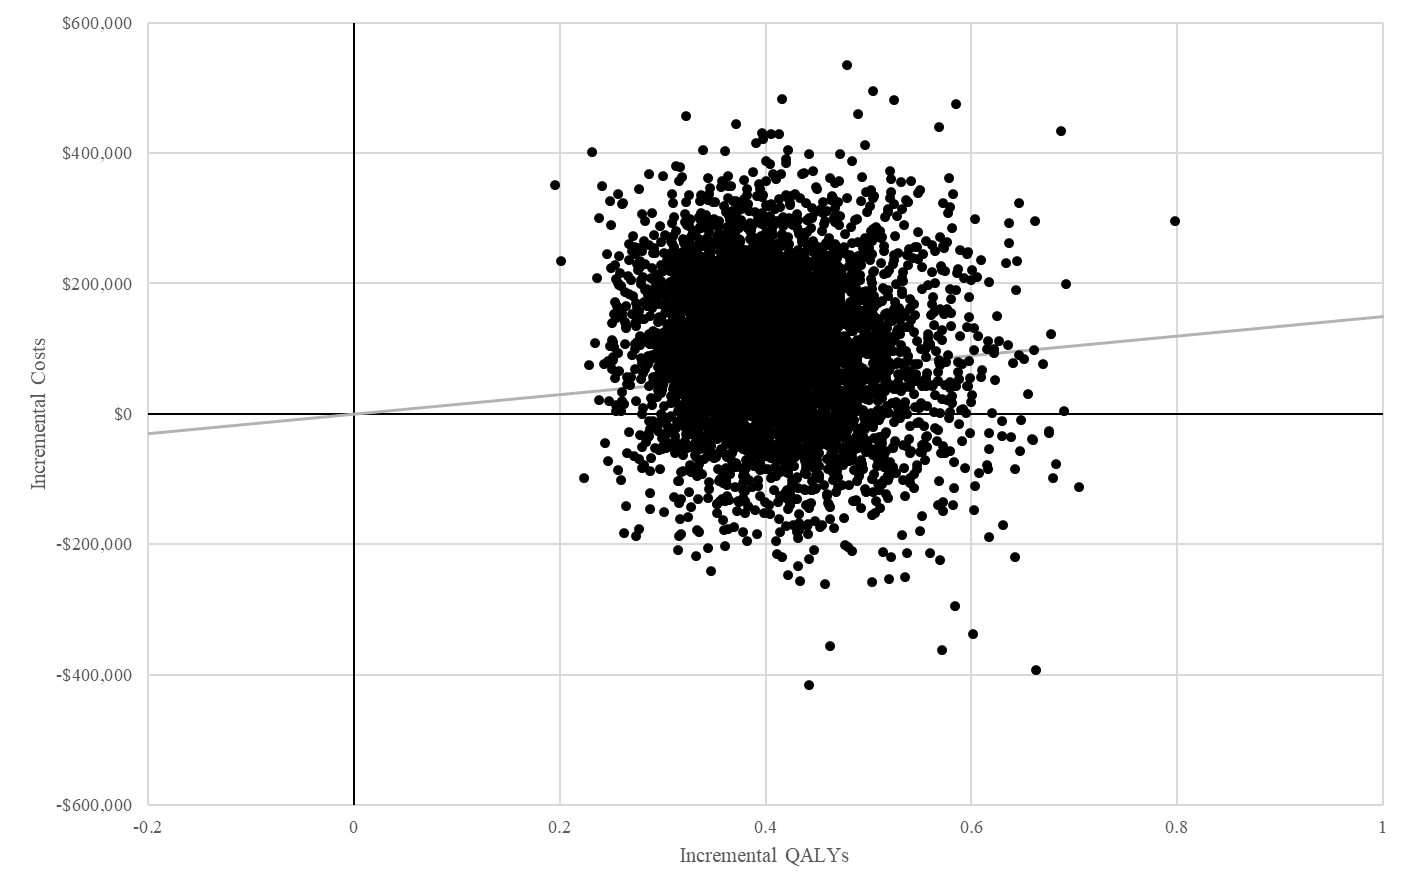

Supplement: supplementary figure.docx [file supplementary%20figure.docx]
